# Supplementary material for: Aberrant innate immune response in lethal infection of macaques with the 1918 influenza virus
Source: Springer Nature journal article supplement (doi:10.1038/nature05495), 2007-01-17
Supplement: 41586_2007_BFnature05495_MOESM1_ESM.pdf [file 41586_2007_BFnature05495_MOESM1_ESM.pdf]

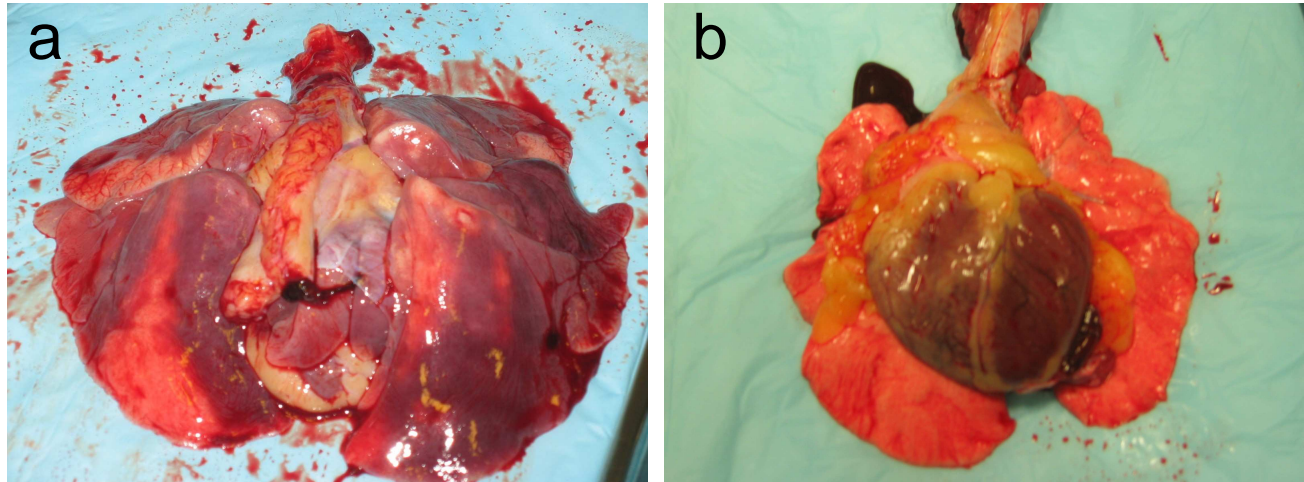

**Supplementary Figure 1** Gross pathology of lungs on day 8 postinfection. **a**, Extensive lesions and haemorrhage are visible in the lungs of 1918 virus-infected animals, consistent with the severe clinical signs and reduced lung function in all of these animals by day 8 p.i. **b**, By contrast, lungs of the K173-infected animal were not visibly affected by infection.

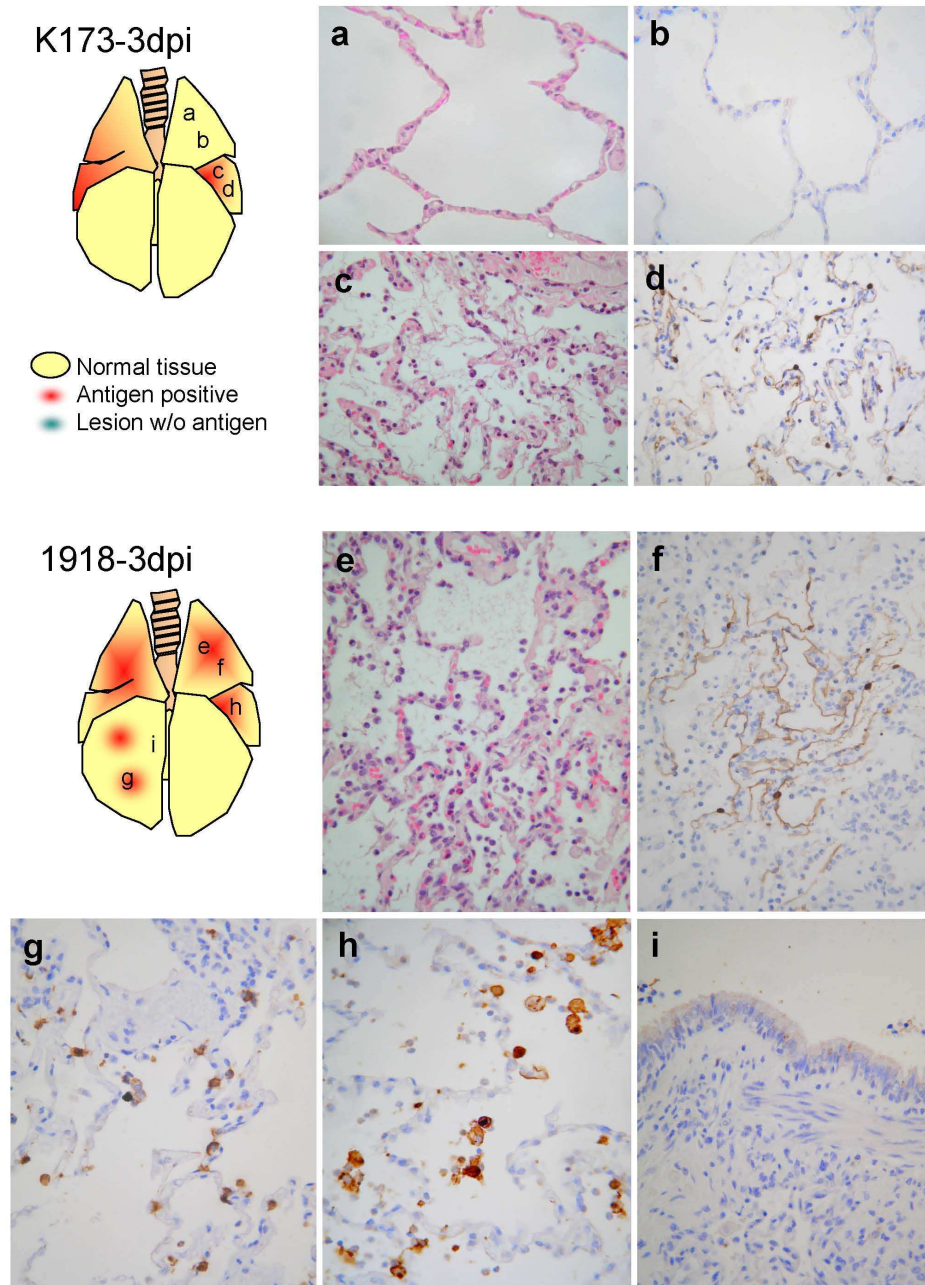

**Supplementary Figure 2** Pathologic examination of lungs infected with the 1918 or K173 virus on day 3 p.i. **a**, In a K173-infected animal most of the lung, including the cranial and caudal lobes, were normal in appearance and **b**, no viral antigen was detected. **c**, Focal mild alveolitis with intra-alveolar exudation of neutrophils, lymphocytes, and macrophages was detected in the middle lobes of both lungs. **d**, Many of the nuclei and the flattened linear cytoplasm in the regions with mild alveolitis were positive for viral antigen (brown). However, there were no antigen-positive cells in the alveolar space. **e**, Histology revealed scattered mild to moderate alveolitis. **f**, Viral antigen was sporadically detected as linear staining (brown) along the alveolar wall, similar to lungs of the K173 virus-infected animal. **g**, However, most viral antigen was observed in cells with plump cytoplasm lining the alveolar wall. **h**, In contrast to the K173-infected animal, many desquamated antigen-positive cells were detected in parts of the alveolar space. **i**, Viral antigen was not frequently detected in the bronchioles.

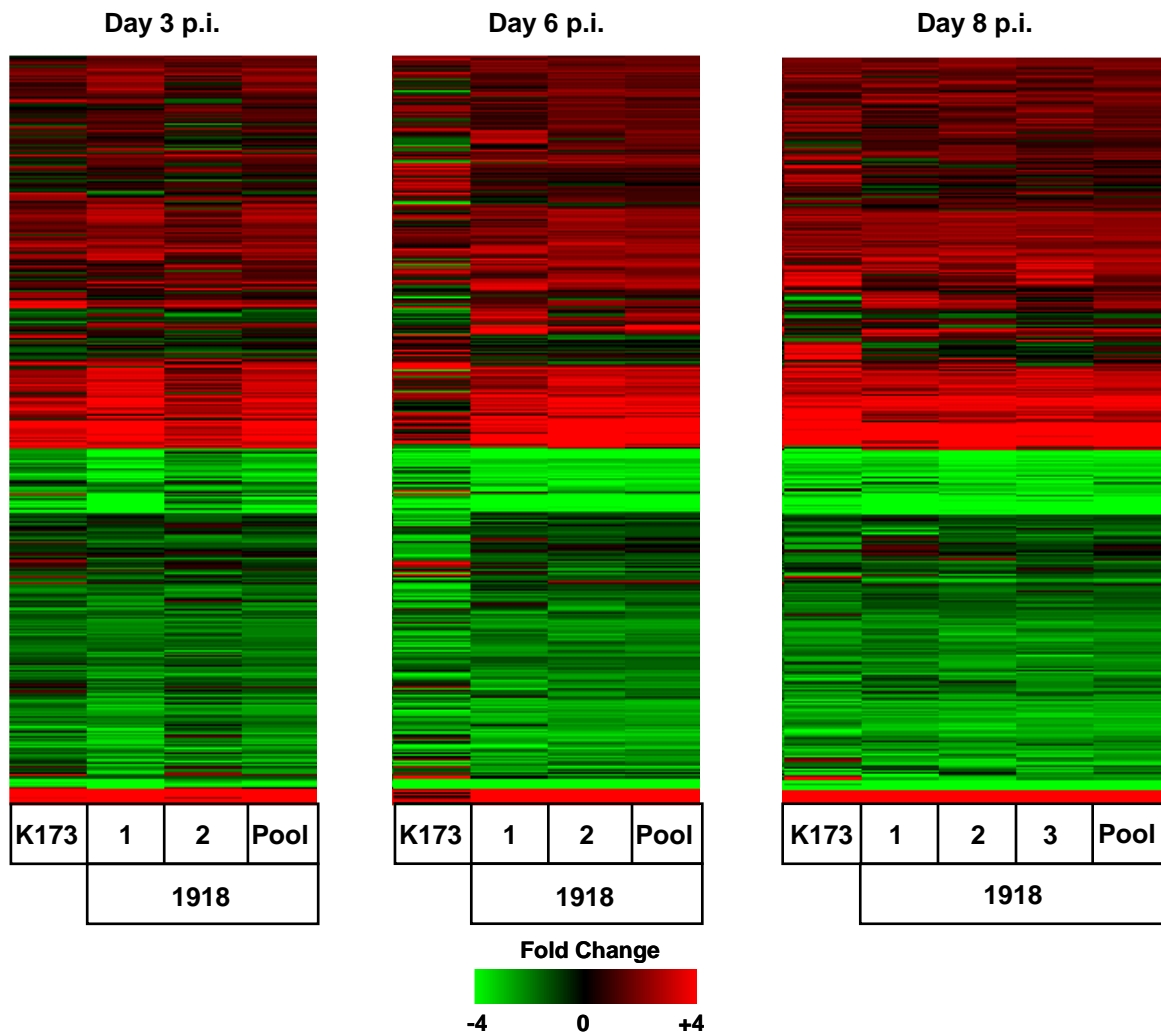

**Supplementary Figure 3** Overall gene expression profiles in individual and pooled infections. Hierarchical clustering diagram showing the expression profiles of individual animals (n=4 arrays per animal) and Resolver analysis software error-weighted *in silico* pooling of replicate animals (n=8 arrays for 1918 days 3 and 6 p.i., and n=12 arrays for 1918 day 8 p.i.). Individual animals are denoted as numbers 1 to 3 and the *in silico* pooled samples are denoted as Pool. Genes displayed were changed >2-fold (P<0.01) in at least 1 of the experiments compared to uninfected controls.

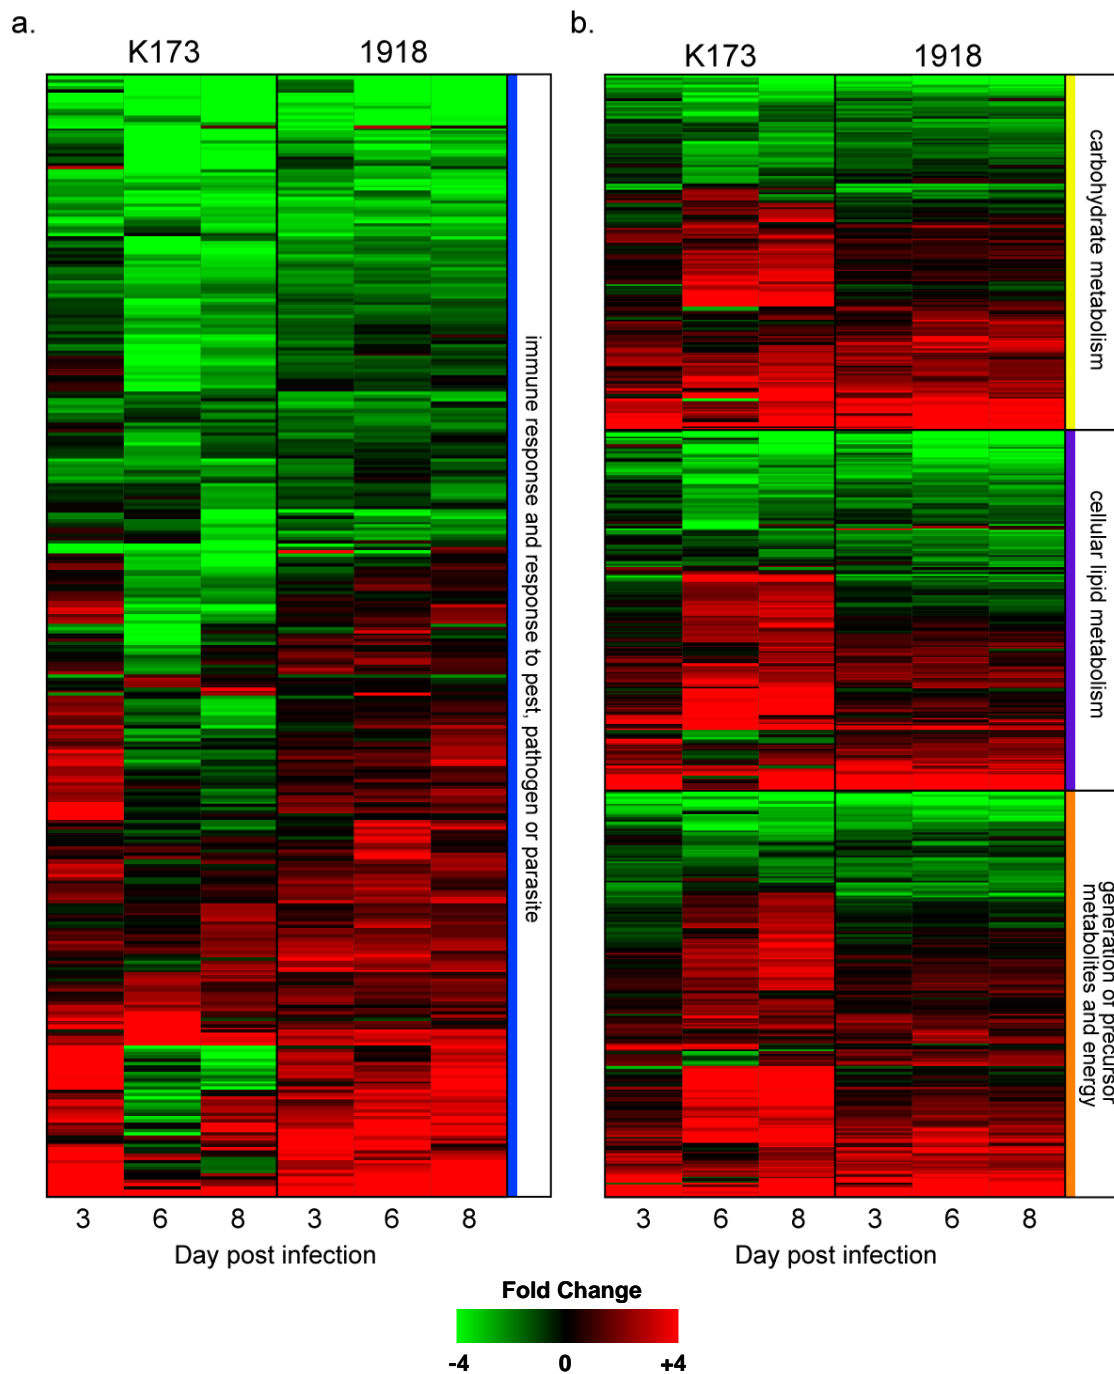

**Supplementary Figure 4** Selected gene ontology (GO) analysis of differentially regulated genes in K173 and 1918 virus infected bronchus. Hierarchical clustering diagram showing the expression profiles of individual K173 animals ( $n=4$  arrays per animal) and in silico pooled 1918 replicate animals ( $n=8$  arrays for 1918 days 3 and 5 p.i., and  $n=12$  arrays for 1918 day 8 p.i.). GO analysis was performed using the FatiGO analysis suite (<http://fatigo.bioinfo.cipf.es/>).

| <b>Supplementary Table 1</b> Virus isolation from swabs <sup>a</sup> |          |              |   |                 |                 |   |                 |                 |                 |                 |   |
|----------------------------------------------------------------------|----------|--------------|---|-----------------|-----------------|---|-----------------|-----------------|-----------------|-----------------|---|
| Swab                                                                 | Day p.i. | 1918 animals |   |                 |                 |   |                 |                 | K173 animals    |                 |   |
|                                                                      |          | 1            | 2 | 3               | 4               | 5 | 6               | 7               | 1               | 2               | 3 |
| Nasal                                                                | 3        | +            | + | -               | +               | - | +               | +               | -               | -               | - |
|                                                                      | 6        | +            | + | +               | NA <sup>b</sup> | + | +               | NA <sup>b</sup> | +               | NA <sup>b</sup> | - |
|                                                                      | 8        | -            | + | NA <sup>c</sup> | -               | - | NA <sup>c</sup> | -               | NA <sup>c</sup> | -               | - |
| Throat                                                               | 3        | +            | + | -               | +               | - | -               | +               | -               | -               | - |
|                                                                      | 6        | +            | + | +               | NA <sup>b</sup> | - | -               | NA <sup>b</sup> | +               | NA <sup>b</sup> | + |
|                                                                      | 8        | -            | + | NA <sup>c</sup> | -               | - | NA <sup>c</sup> | -               | NA <sup>c</sup> | -               | - |

<sup>a</sup>virus isolated (+), virus not isolated (-) in MDCK cells.

<sup>b</sup>Not available, euthanized on day 3 p.i.

<sup>c</sup>Not available, euthanized on day 6 p.i.

**Supplementary Table 2** Description of genes listed in Fig.4

Fig. 4B Gene List

| Primary Sequence Name | Sequence Description               | Accession # |
|-----------------------|------------------------------------|-------------|
| IFNA17                | Interferon, alpha 17               | NM_021268   |
| IFNA21                | Interferon, alpha 21               | NM_002175   |
| IFNA6                 | Interferon, alpha 6                | NM_021002   |
| IFNA16                | Interferon, alpha 16               | NM_002173   |
| IFNA1                 | Interferon, alpha 1                | NM_024013   |
| IL17B                 | Interleukin 17B                    | NM_014443   |
| CCL27                 | Chemokine (C-C motif) ligand 27    | NM_006664   |
| CXCL6                 | Chemokine (C-X-C motif) ligand 6   | NM_002993   |
| CXCL1                 | Chemokine (C-X-C motif) ligand 1   | NM_001511   |
| CXCL13                | Chemokine (C-X-C motif) ligand 13  | NM_006419   |
| CCL11                 | Chemokine (C-C motif) ligand 11    | NM_002986   |
| IL8                   | Interleukin 8                      | NM_000584   |
| CXCL11                | Chemokine (C-X-C motif) ligand 11  | NM_005409   |
| CXCL10                | Chemokine (C-X-C motif) ligand 10  | NM_001565   |
| CXCL2                 | Chemokine (C-X-C motif) ligand 2   | NM_002089   |
| IL6                   | Interleukin 6 (interferon, beta 2) | NM_000600   |

Fig. 4C Gene List

| Primary Sequence Name | Sequence Description                                                       | Accession #  |
|-----------------------|----------------------------------------------------------------------------|--------------|
| HLA-DRB3              | Major histocompatibility complex, class II, DR beta 3                      | NM_022555    |
| HLA-DRB5              | Major histocompatibility complex, class II, DR beta 3                      | AF490771     |
| HLA-DRB1              | Major histocompatibility complex, class II, DR beta 4                      | NM_002124    |
| IFITM2                | Interferon induced transmembrane protein 2 (1-8D)                          | NM_006435    |
| IFITM3                | Interferon induced transmembrane protein 3 (1-8U)                          | NM_021034    |
| IFIT5                 | Interferon-induced protein with tetratricopeptide repeats 5                | NM_012420    |
| IFIH1                 | (MDA5) Interferon induced with helicase C domain 1                         | NM_022168    |
| IFI35                 | Interferon-induced protein 35                                              | NM_005533    |
| IRF1                  | Interferon regulatory factor 1                                             | NM_002198    |
| RTP4                  | 28kD interferon responsive protein                                         | NM_022147    |
| IFI16                 | Interferon, gamma-inducible protein 16                                     | NM_005531    |
| EIF2AK2               | Eukaryotic translation initiation factor 2-alpha kinase 2                  | NM_002759    |
| HLA-B                 | Major histocompatibility complex, class I, B                               | NM_005514    |
| MR1                   | Major histocompatibility complex, class I-related                          | NM_001531    |
| SP110                 | SP110 nuclear body protein                                                 | NM_004510    |
| ADAR                  | Adenosine deaminase, RNA-specific                                          | NM_001111    |
| HLA-A                 | Major histocompatibility complex, class I, A                               | NM_002116    |
| HLA-C                 | Major histocompatibility complex, class I, C                               | NM_002117    |
| IFITM1                | Interferon induced transmembrane protein 1 (9-27)                          | NM_003641    |
| G1P3                  | Interferon, alpha-inducible protein (clone IFI-6-16)                       | NM_002038    |
| DDX58                 | (RIG-I) DEAD (Asp-Glu-Ala-Asp) box polypeptide 58                          | NM_014314    |
| IRF2BP2               | Interferon regulatory factor 2 binding protein 2                           | BC020516     |
| SOC56                 | Suppressor of cytokine signaling 6                                         | NM_004232    |
| IFIT2                 | Interferon-induced protein with tetratricopeptide repeats 2                | NM_001547    |
| IFIT3                 | Interferon-induced protein with tetratricopeptide repeats 3                | NM_001549    |
| IFIT1                 | Interferon-induced protein with tetratricopeptide repeats 1                | NM_001001887 |
| MX2                   | Myxovirus (influenza virus) resistance 2 (mouse)                           | NM_002463    |
| IRF7                  | Interferon regulatory factor 7                                             | NM_001572    |
| G1P2                  | Interferon, alpha-inducible protein (clone IFI-15K)                        | NM_005101    |
| OAS3                  | 2'-5'-oligoadenylate synthetase 3, 100kDa                                  | NM_006187    |
| OAS2                  | 2'-5'-oligoadenylate synthetase 2, 69/71kDa                                | NM_016817    |
| OAS1                  | 2'-5'-oligoadenylate synthetase 1, 40/46kDa                                | NM_016816    |
| HLA-E                 | Major histocompatibility complex, class I, E                               | NM_005516    |
| HLA-F                 | Hypothetical protein FLJ35429                                              | NM_018950    |
| IFI44                 | Interferon-induced protein 44                                              | NM_006417    |
| STAT1                 | Signal transducer and activator of transcription 1, 91kDa                  | NM_139266    |
| MX1                   | Myxovirus (influenza virus) resistance 1, interferon-inducible protein p78 | NM_002462    |
| ISG20                 | Interferon stimulated exonuclease gene 20kDa                               | NM_002201    |
| GBP1                  | Guanylate binding protein 1, interferon-inducible, 67kDa                   | NM_002053    |
| OASL                  | 2'-5'-oligoadenylate synthetase-like                                       | NM_003733    |
